# Supplementary material for: Potential Use of Deep-Sea Sediment Bacteria for Oil Spill Biodegradation: A Laboratory Simulation
Source: MDPI journal article supplement (doi:10.3390/microorganisms10081616), 2022-08-10
Supplement: s1 [file s1]

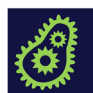

## Supplementary Files

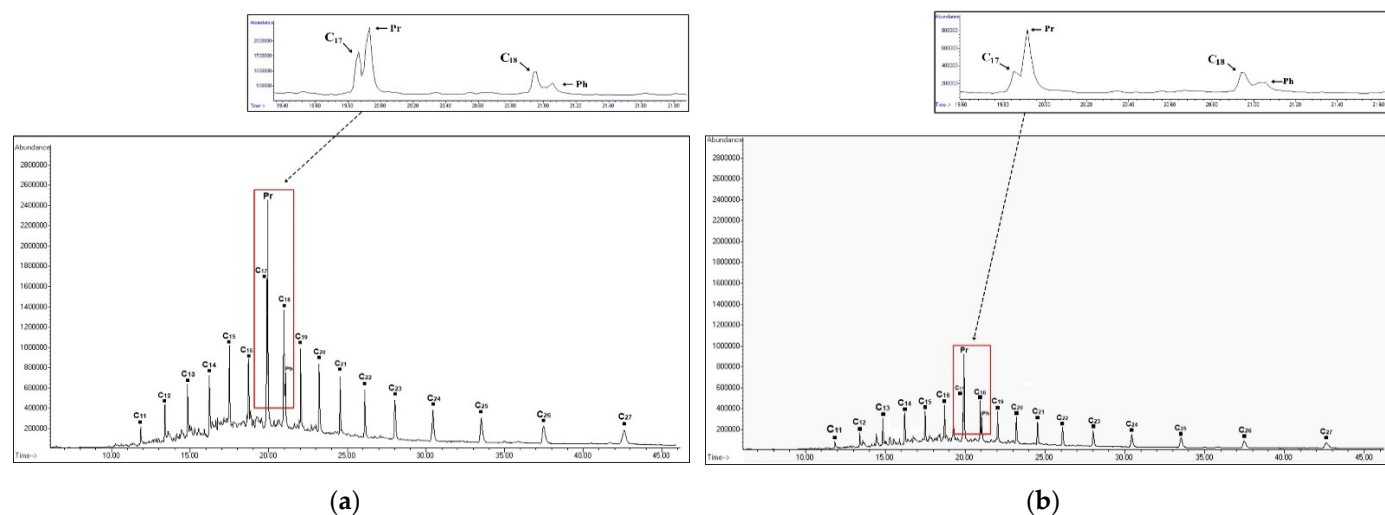

Figure S1. Content change of paraffinic compounds found in crude oil: (a) before and (b) after biodegradation from GC-MS analysis.

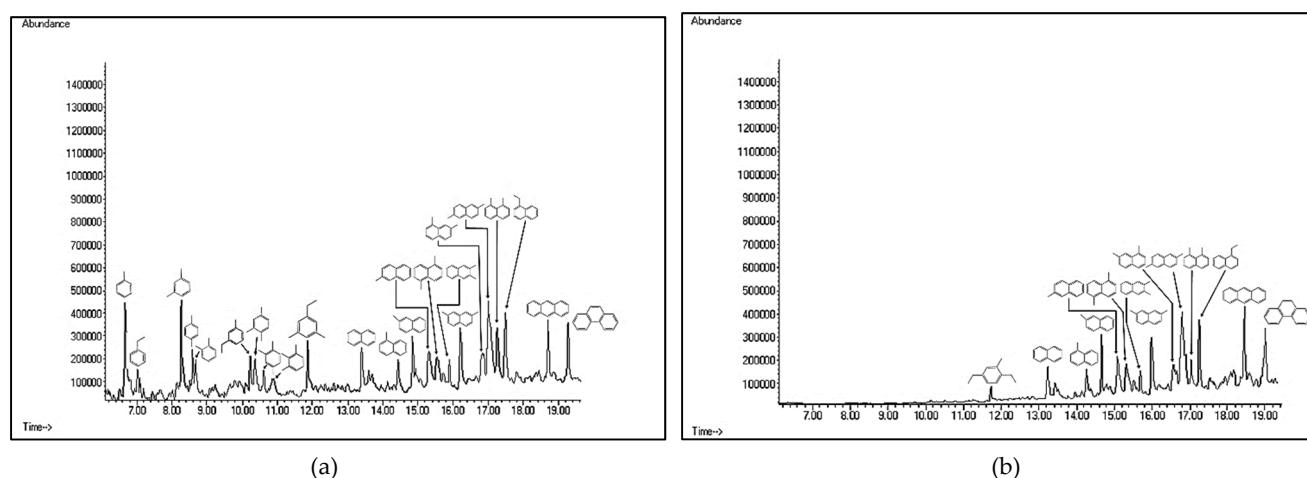

Figure S2. Content change of aromatic compounds found in crude oil (a) before and (b) after biodegradation from mass spectra raw data of GC-MS analysis.
